# Supplementary material
Source: PubMed Central journal article supplement (PMC10593361)
Supplement: NIHMS1931694-supplement-Supplementary_info.pdf [file NIHMS1931694-supplement-Supplementary_info.pdf]

Supplementary Figure 1

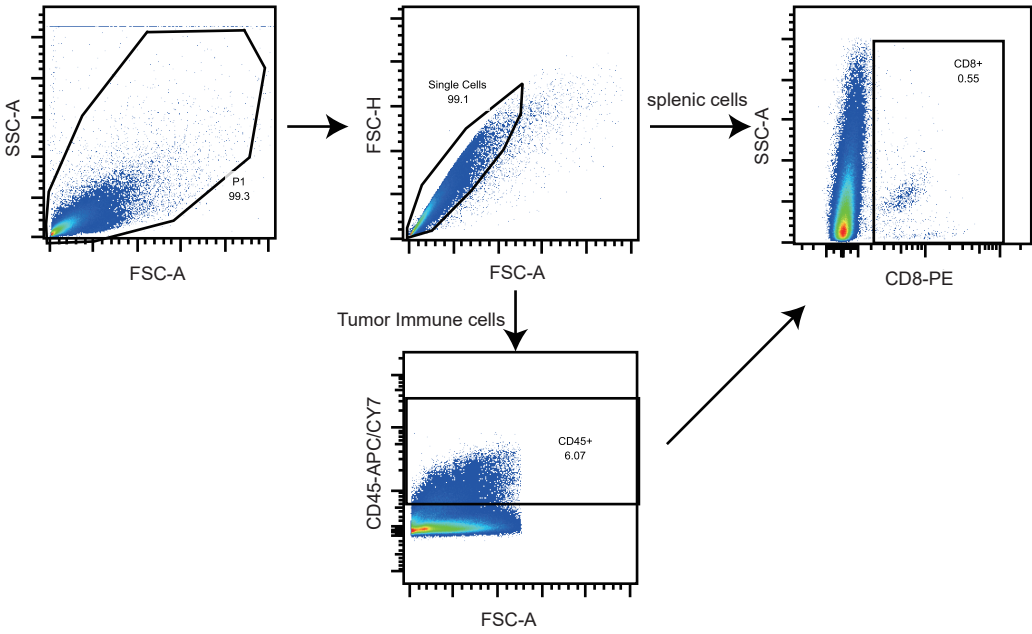

## **Supplementary Figure Legends**

### **Supplementary Figure 1. Flow Cytometry gating strategy.**

Cells were gated based on FSC-A/SSC-A parameters and then gated by FSC-A versus FSC-H to select single cells. Splenic cells were further gated for CD8 positive cells. Immune cells from tumor tissues were further gated for CD45 positive cells. Gates indicating boundaries between "positive" and "negative" are based on staining of isotype control antibodies.

**Supplementary Table 1. Antibody resources table**

| <b>Antibody for immunoblotting</b>                      | <b>Vendor</b>             | <b>Catalogue number</b> |
|---------------------------------------------------------|---------------------------|-------------------------|
| Acod1 (1:1000)                                          | Abcam                     | ab222411                |
| beta-actin (1:5000)                                     | Cell signaling technology | #3700                   |
| Phospho-Stat3 (Tyr705) XP mAb (1:1000)                  | Cell signaling technology | #9145                   |
| Stat3(124H6) Mouse mAb (1:1000)                         | Cell signaling technology | #9139                   |
| Phospho-Stat1 (Tyr701) Rabbit mAb (1:1000)              | Cell signaling technology | #9167                   |
| Stat1(D1K9Y) mAb (1:1000)                               | Cell signaling technology | #14994                  |
| Phospho-Jak1(Tyr1034/1035) mAb (1:1000)                 | Cell signaling technology | #3331                   |
| Phospho-Jak2 (Tyr1007/1008) mAb (1:1000)                | Cell signaling technology | #3771                   |
| Jak1(D1T6W) antibody (1:1000)                           | Cell signaling technology | #50996                  |
| Jak2(D2E12) antibody (1:1000)                           | Cell signaling technology | #3230                   |
|                                                         |                           |                         |
| <b>Antibody for Immunofluorescence</b>                  |                           |                         |
| Acod1 (1:100)                                           | Abcam                     | ab238580                |
| LOX1 (1:100)                                            | Abcam                     | ab126538                |
| CD163 (1:200)                                           | Cell signaling technology | #93498S                 |
| CD45R/B220                                              | Biolegend                 | #103202                 |
| CD3                                                     | Dako                      | A0452                   |
|                                                         |                           |                         |
| <b>Antibody for flow cytometry</b>                      |                           |                         |
| anti-CD16/CD32 mAb (1:50)                               | Invitrogen                | #14-0161-82             |
| Alexa Fluor® 488 anti-mouse/human CD11b Antibody (1:50) | Biolegend                 | #101217                 |
| APC anti-mouse Ly6G antibody (1:50)                     | Biolegend                 | #127614                 |
| PE anti-mouse Ly6C antibody (1:50)                      | Biolegend                 | #128008                 |
| APC anti-mouse CD4 Antibody (1:50)                      | Biolegend                 | #100412                 |
| APC/CY7 anti-mouse CD45 antibody (1:50)                 | Biolegend                 | #103116                 |
| APC anti-mouse IFN $\gamma$ (1:50)                      | Biolegend                 | #505810                 |
| PE/Cyanine7 anti-mouse TNF $\alpha$ (1:50)              | Biolegend                 | #506323                 |
| FITC anti-human/mouse Granzyme B (1:50)                 | Biolegend                 | #515403                 |
| PE anti-mouse Perforin (1:50)                           | Biolegend                 | #154305                 |
| PE/CY7, isotype ctr (1:50)                              | Biolegend                 | #400618                 |
| APC, isotype ctr (1:50)                                 | Biolegend                 | #401210                 |
| FITC, isotype ctr (1:50)                                | Biolegend                 | #406001                 |
| FITC Mouse IgG1, $\kappa$ Isotype Ctrl Antibody (1:50)  | Biolegend                 | #400108                 |
| APC Rat IgG1, $\kappa$ Isotype Ctrl Antibody (1:50)     | Biolegend                 | #400412                 |
| PE/Cyanine7 Rat IgG1 Antibody (1:50)                    | Biolegend                 | #400416                 |

|                                                                             |                          |          |
|-----------------------------------------------------------------------------|--------------------------|----------|
| PE Rat IgG2a, κ Isotype Ctrl Antibody (1:50)                                | Biolegend                | #400508  |
| PE/Cyanine7 anti-mouse IL-2 Antibody (1:50)                                 | Biolegend                | #503831  |
| APC anti-mouse CD8a (1:50)                                                  | Biolegend                | #100712  |
| FITC anti-mouse CD8a (1:50)                                                 | Biolegend                | #100706  |
| PE anti-mouse CD8a (1:50)                                                   | Biolegend                | #100708  |
| PE anti-mouse CD69 (1:50)                                                   | Biolegend                | #104507  |
| FITC anti-human CD8a (1:50)                                                 | Biolegend                | #300911  |
| 5-Hydroxymethylcytosine (5-hmC) (1:200)                                     | Active Motif             | #39769   |
| Rabbit IgG Isotype Control (1:200)                                          | Thermo Fisher Scientific | #02-6102 |
| Donkey anti-Rabbit IgG (H+L) Secondary Antibody, Alexa Fluor™ 647 (1:2000 ) | Invotrogen               | #A-31573 |
|                                                                             |                          |          |
| <b>Antibody for in vivo experiment</b>                                      |                          |          |
| Ultra-LEAF™ Purified anti-mouse CD279(PD-1)                                 | BioLegend                | #135250  |
| Ultra-LEAF™ Purified Rat IgG2a, κ Isotype Ctrl                              | BioLegend                | #400566  |
| Anti-mouse CD8a in vivo antibody                                            | BioXcell                 | #BE0117  |
| Rat IgG2b isotype control in vivo antibody                                  | BioXcell                 | #BE0090  |
